# Supplementary material
Source: Springer Nature journal article supplement (https://www.springermedizin.de/resource/supplementary/12936_2009_910_MOESM1_ESM.pdf/9548518)
Supplement: MOESM1 [file 9548518]

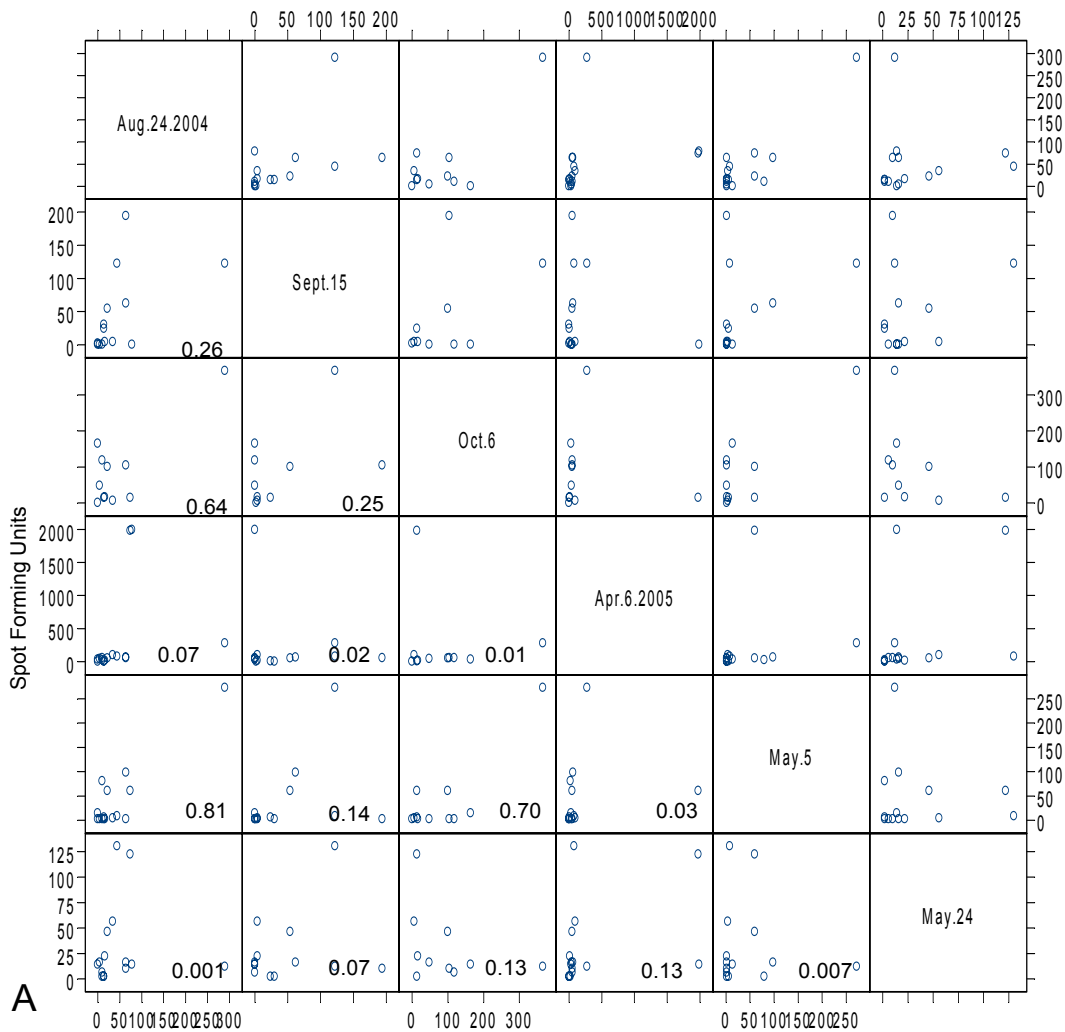

Supplementary Figure 1: A: MSP-1<sub>42</sub> (3D7) stimulated INF- $\gamma$  ELISPOT data comparisons between all time points with Pearson's correlation  $R^2$  value in the bottom right corner of each comparison. B: depicts MSP-1<sub>42</sub> (3D7) stimulated INF- $\gamma$  ELISPOT data for each individual at each time point.

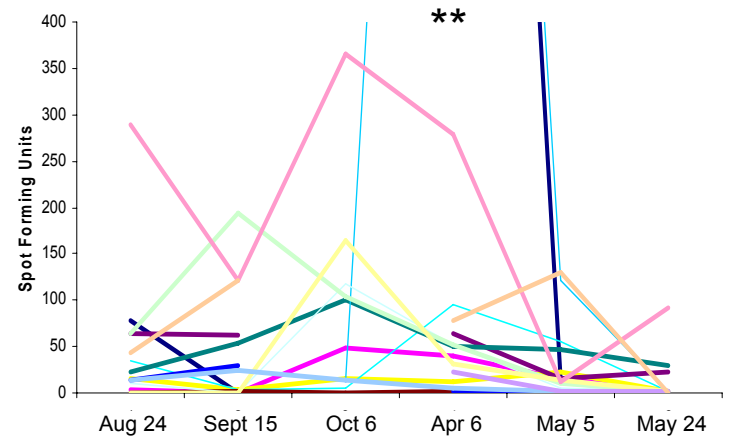

**B** \*\* two data points outside scale at approximately 1900 SFU
